# Supplementary material for: DNA Repair Pathway Selection Caused by Defects in TEL1, SAE2, and De Novo Telomere Addition Generates Specific Chromosomal Rearrangement Signatures
Source: PubMed Central journal article supplement (PMC3974649; doi:10.1371/journal.pgen.1004277), 2014-04-03
Supplement: pgen.1004277.s002.pdf [file pgen.1004277.s002.pdf]

Putnam et al. 2014. Figure S2.

| Isolate        | Junction Sequence                                                                                                                                                                                                   | Isolate | Junction Sequence                                                                                                                                                                                                            |
|----------------|---------------------------------------------------------------------------------------------------------------------------------------------------------------------------------------------------------------------|---------|------------------------------------------------------------------------------------------------------------------------------------------------------------------------------------------------------------------------------|
| 212            | <p>URA3 insertion:<br/> uGCR ChrV 28999:<br/> CAATGAAGCACACA::AGTTTGTGTTGCTTTTTC<br/> CAATGAAGCACACA::CATAACATTTGGTATAA<br/> AGTCAAGAACATAT::CATAACATTTGGTATAA<br/> :ChrV 29606<br/> :uGCR ChrV 36496</p>           | 221     | <p>ChrV 19099:<br/> uGCR ChrV 21442:<br/> ACTCTCTCCTTGGCA::CGGACCTAAAAATAAC<br/> ACTCTCTCCTTGGCA::GAGTATTCTAAATTAG<br/> ATGTCTGAGTTAGGT::GAGTATTCTAAATTAG<br/> :CAN1 insertion<br/> :uGCR ChrV 32399</p>                     |
| 214<br>(left)  | <p>ChrV 12870:<br/> uGCR ChrV 15213:<br/> TTTGGTGAGATAGTTT:ACG:CCTATAATATATA<br/> TTTGGTGAGATAGTTT:ACG:TCATCGACATCTA<br/> :ACG:TCATCGACATCTA<br/> :Ty element</p>                                                   | 2975    | <p>ChrV 16981:<br/> uGCR ChrV 19324:<br/> GATTATCAGCAATATCAAT:GCC:TAAGGAAGGACAATACT<br/> GATTATCAGCAATATCAAT:GCC:TGCAGTGTACTGGGTTA<br/> GTGCCGATGAGCTCGGTAC:GCC:TGCAGTGTACTGGGTTA<br/> :ChrV 27098<br/> :uGCR ChrV 33988</p> |
| 214<br>(right) | <p>Ty element:<br/> TGGGTGGTATGTTGGAA:TA:<br/> TGGGTGGTATGTTGGAA:TA:TTAGGAATGCCG<br/> GGTATTCTTGAAGAGTC:TA:TTAGGAATGCCG<br/> :ChrV 36143<br/> :uGCR ChrV 40936</p>                                                  | 3115    | <p>ChrV 25355:<br/> uGCR ChrV 27698:<br/> ATTATGACATTTGCAGGACT::CACACCCAGAAGTCCTTTC<br/> ATTATGACATTTGCAGGACT::GCTGGAAGATCTGAATTCT<br/> TCTCATGCGTTCATGCACCA::GCTGGAAGATCTGAATTCT<br/> :can1::hisG insertion</p>             |
| 219            | <p>ChrV 16051:<br/> uGCR ChrV 18395:<br/> GCAATGTCAACAGGAG:TG:TCGCATTTTATGTTTTTT<br/> GCAATGTCAACAGGAG:TG:TGCTATATAGAGTATATG<br/> TTATTTATCACACTAC:TG:TGCTATATAGAGTATATG<br/> :ChrV 42374<br/> :uGCR ChrV 47186</p> | 3118    | <p>ChrV 24590:<br/> uGCR ChrV 26930:<br/> AAATTATTATCATTATC:GCT:ACTTCAGCGATTCAATTT<br/> AAATTATTATCATTATC:GCT:TTGCATCTGATGCTGGCTC<br/> ATATCAGTCTTTGCATG:GCT:TTGCATCTGATGCTGGCTC<br/> :ChrV 29648<br/> :uGCR ChrV 36538</p>  |
| 220            | <p>ChrV 25459:<br/> uGCR ChrV 27802:<br/> TCAAATTGGAAG:TAAAT:AAATAAGGACTG<br/> TCAAATTGGAAG:TAAAT:CGGTCTTTGATC<br/> TTGATCAAAGAT:TAAAT:CGGTCTTTGATC<br/> :ChrV 40094<br/> :uGCR ChrV 44887</p>                      |         |                                                                                                                                                                                                                              |
