# Supplementary material for: DNA Repair Pathway Selection Caused by Defects in TEL1, SAE2, and De Novo Telomere Addition Generates Specific Chromosomal Rearrangement Signatures
Source: PubMed Central journal article supplement (PMC3974649; doi:10.1371/journal.pgen.1004277), 2014-04-03
Supplement: pgen.1004277.s003.pdf [file pgen.1004277.s003.pdf]

Putnam et al. 2014. Figure S3.

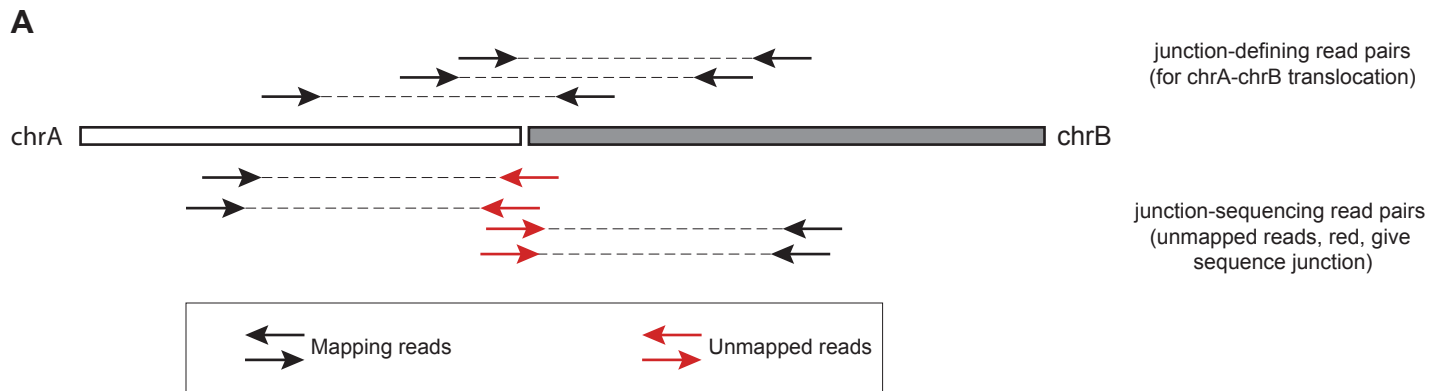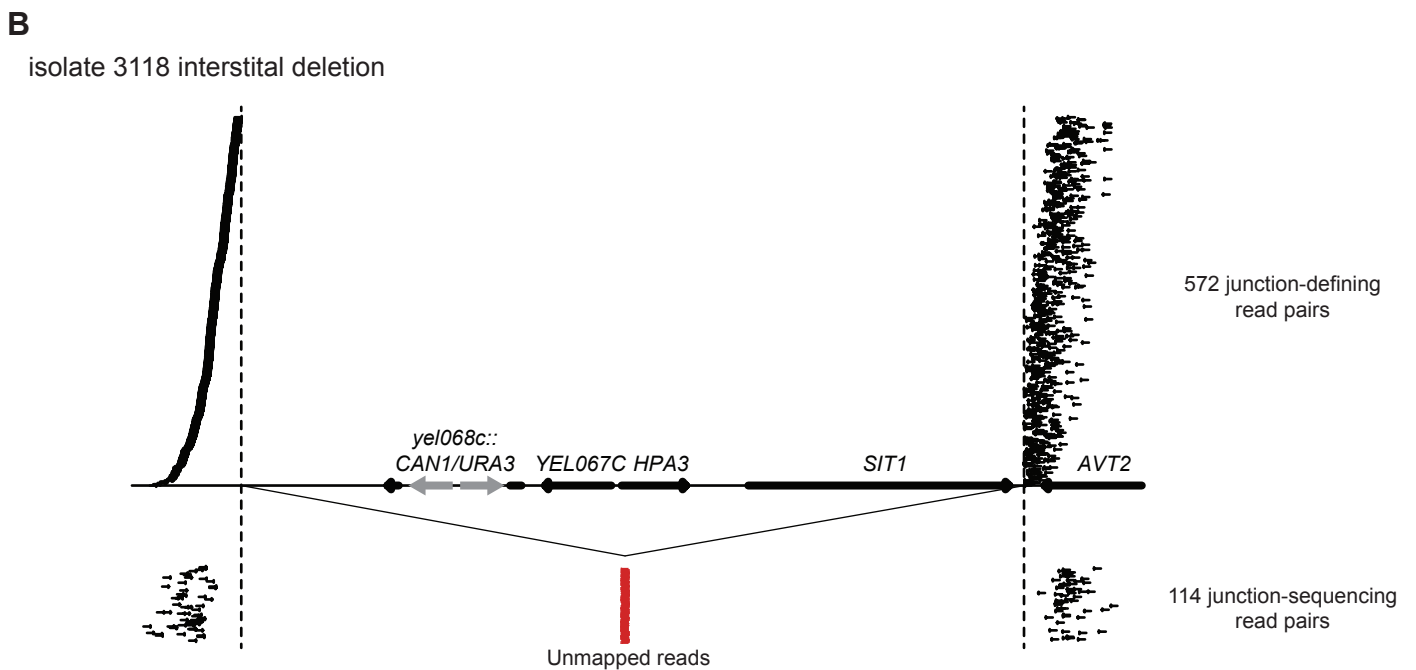

**C**

ChrV 24590:  
ATTGCGGAAGGAGCTTTGCTCTGGTTGAAATTATTATCATTATC :GCT:  
ATTGCGGAAGGAGCTTTGCTCTGGTTGAAATTATTATCATTATC :GCT: TTGCATCTGATGCTGGCTCTACCGACTTCTCGGCGATAAAAAT  
:GCT: TTGCATCTGATGCTGGCTCTACCGACTTCTCGGCGATAAAAAT  
:ChrV 29648

junction sequence from *de novo* read alignment

**D**

ChrV 24590:  
ATTGCGGAAGGAGCTTTGCTCTGGTTGAAATTATTATCATTATC :GCT:  
ATTGCGGAAGGAGCTTTGCTCTGGTTGAAATTATTATCATTATC :GCT: TTGCATCTGATGCTGGCTCTACCGACTTCTCGGCGATAAAAAT  
:GCT: TTGCATCTGATGCTGGCTCTACCGACTTCTCGGCGATAAAAAT  
:ChrV 29648

junction sequence from PCR amplification and Sanger sequencing
