# Supplementary material for: DNA Repair Pathway Selection Caused by Defects in TEL1, SAE2, and De Novo Telomere Addition Generates Specific Chromosomal Rearrangement Signatures
Source: PubMed Central journal article supplement (PMC3974649; doi:10.1371/journal.pgen.1004277), 2014-04-03

Isolate 217

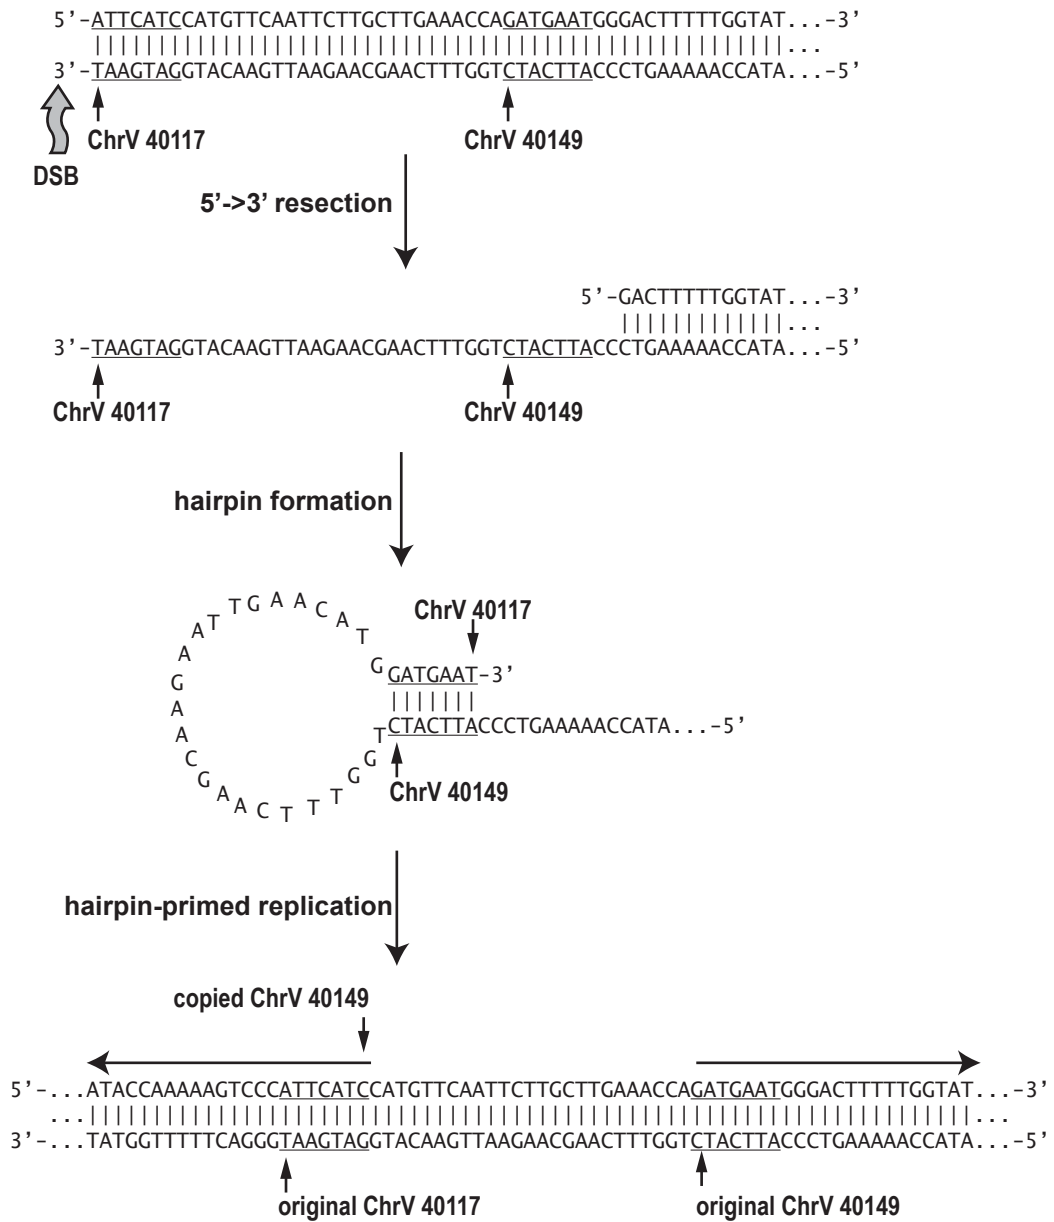

Annotated junction sequence

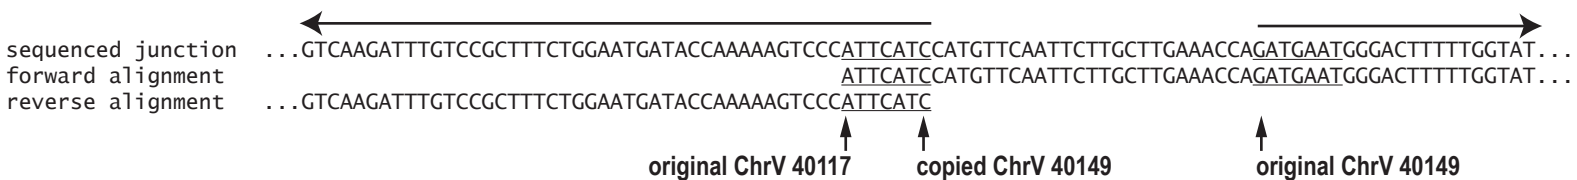



Isolate 365

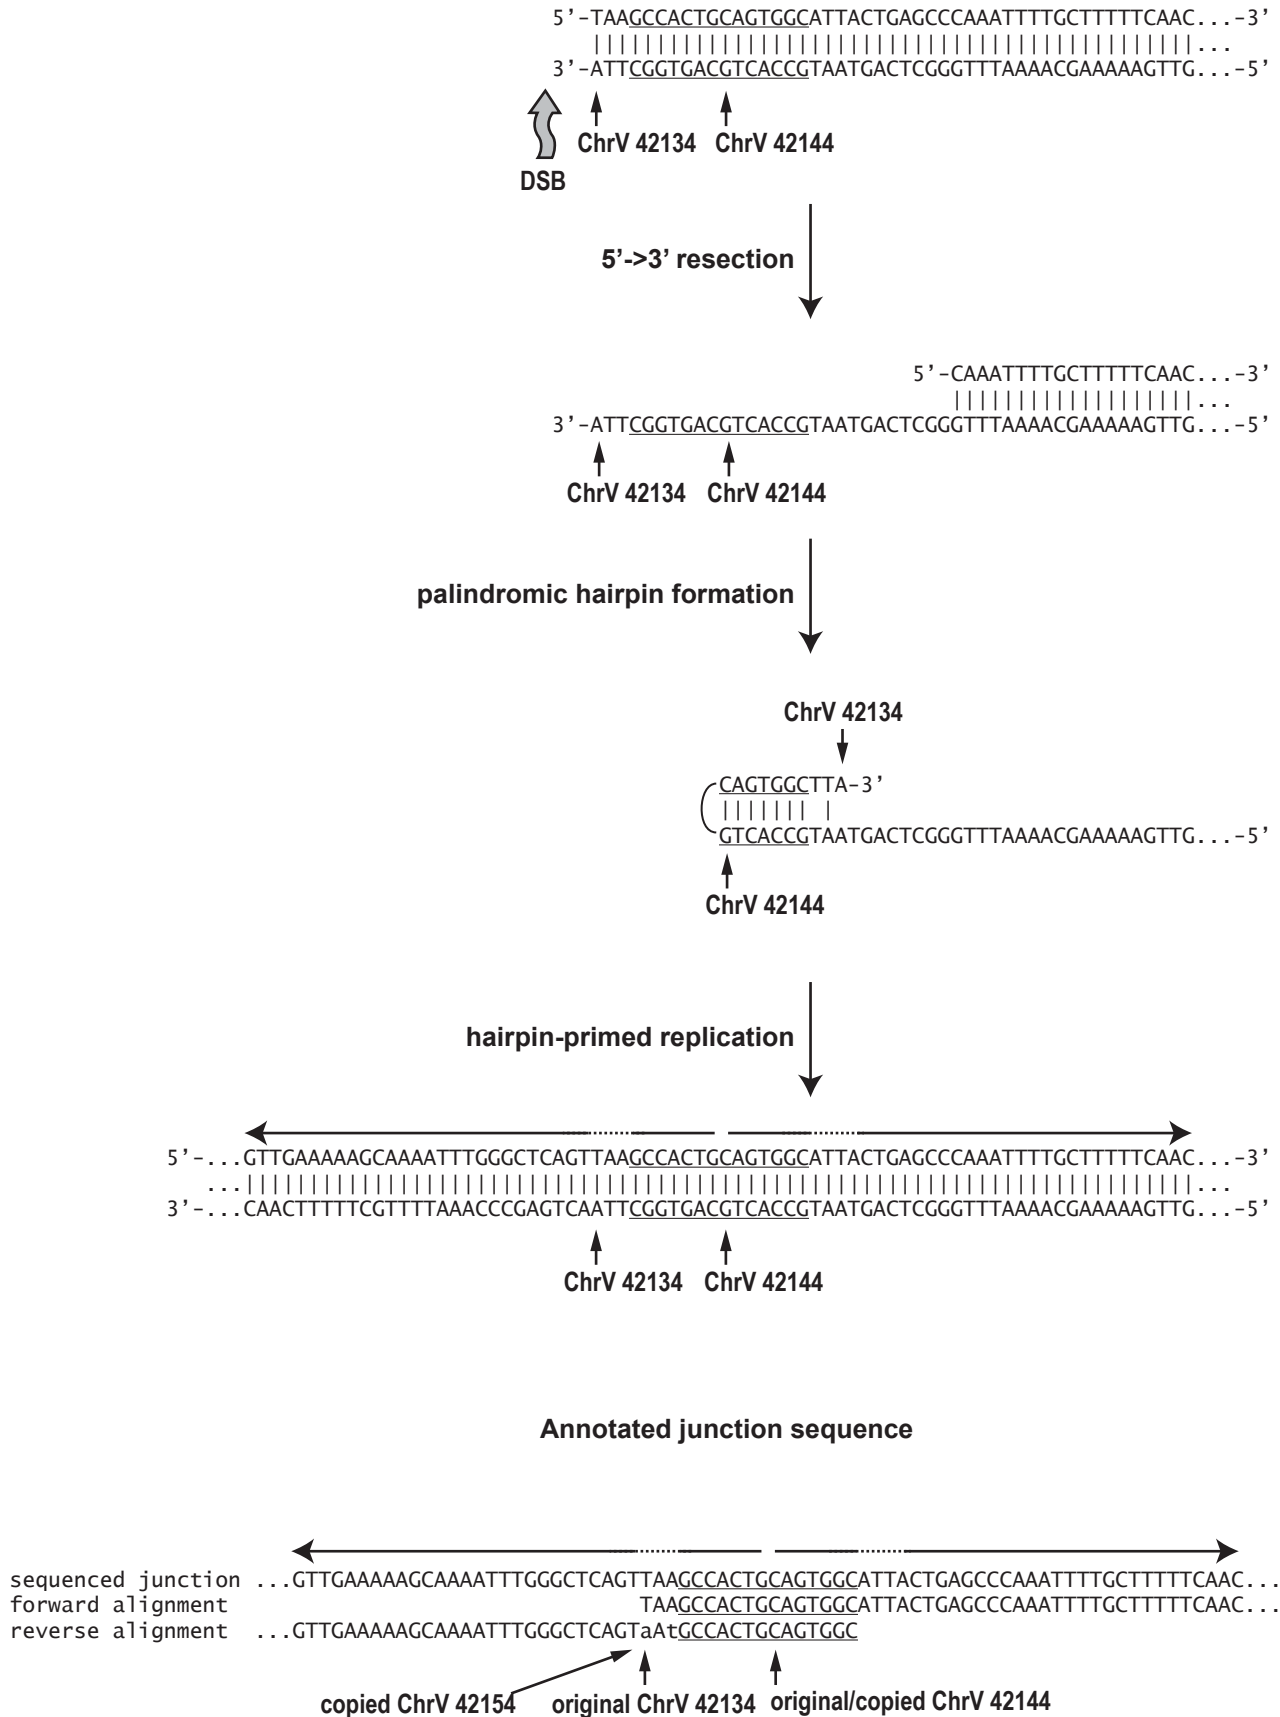

Isolate 2977 (in *hisG* insertion from *Samonella enterica* genome CP003416.1)

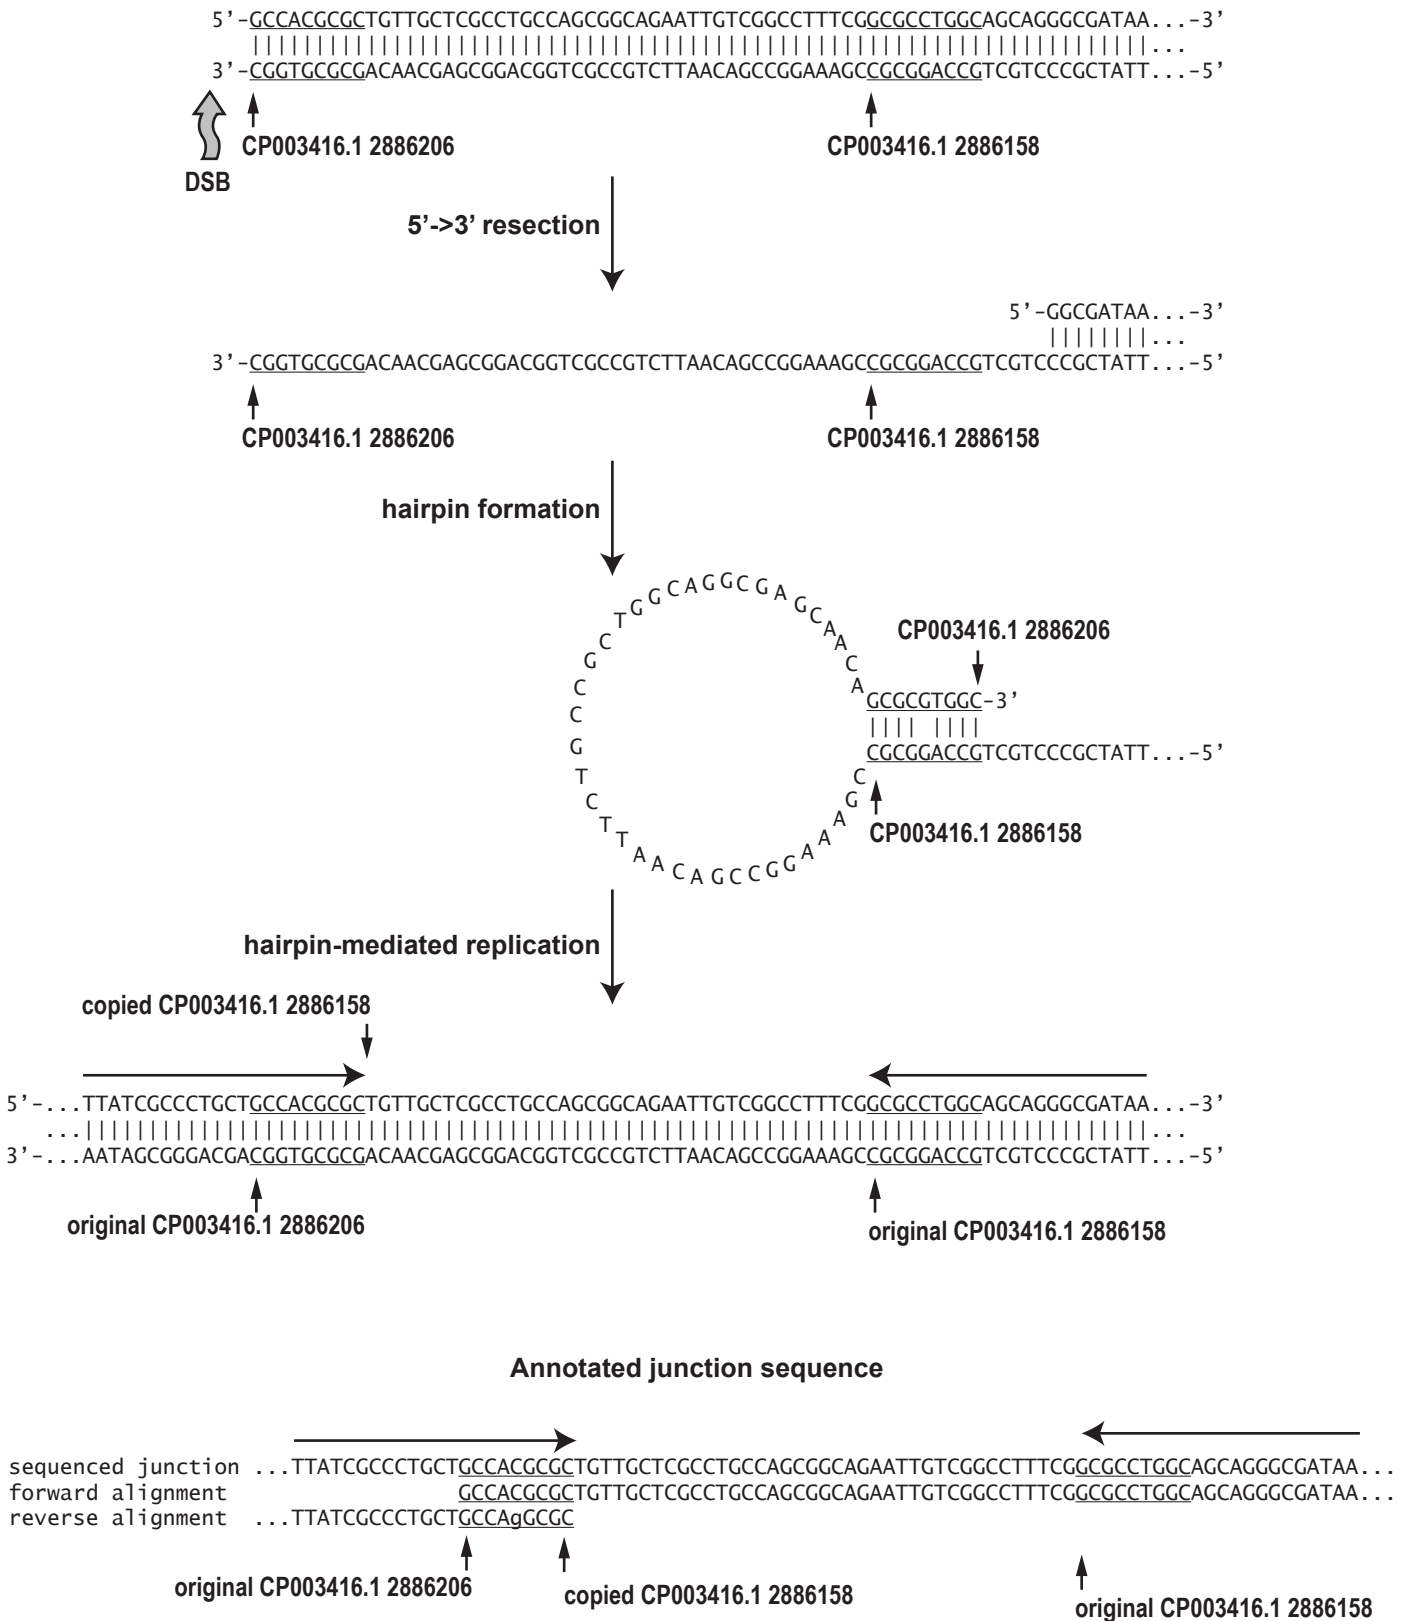



Putnam et al. 2014. Figure S5 F.

Isolates 3121, 3125 (in *hisG* insertion from *Salmonella enterica* genome CP003416.1)

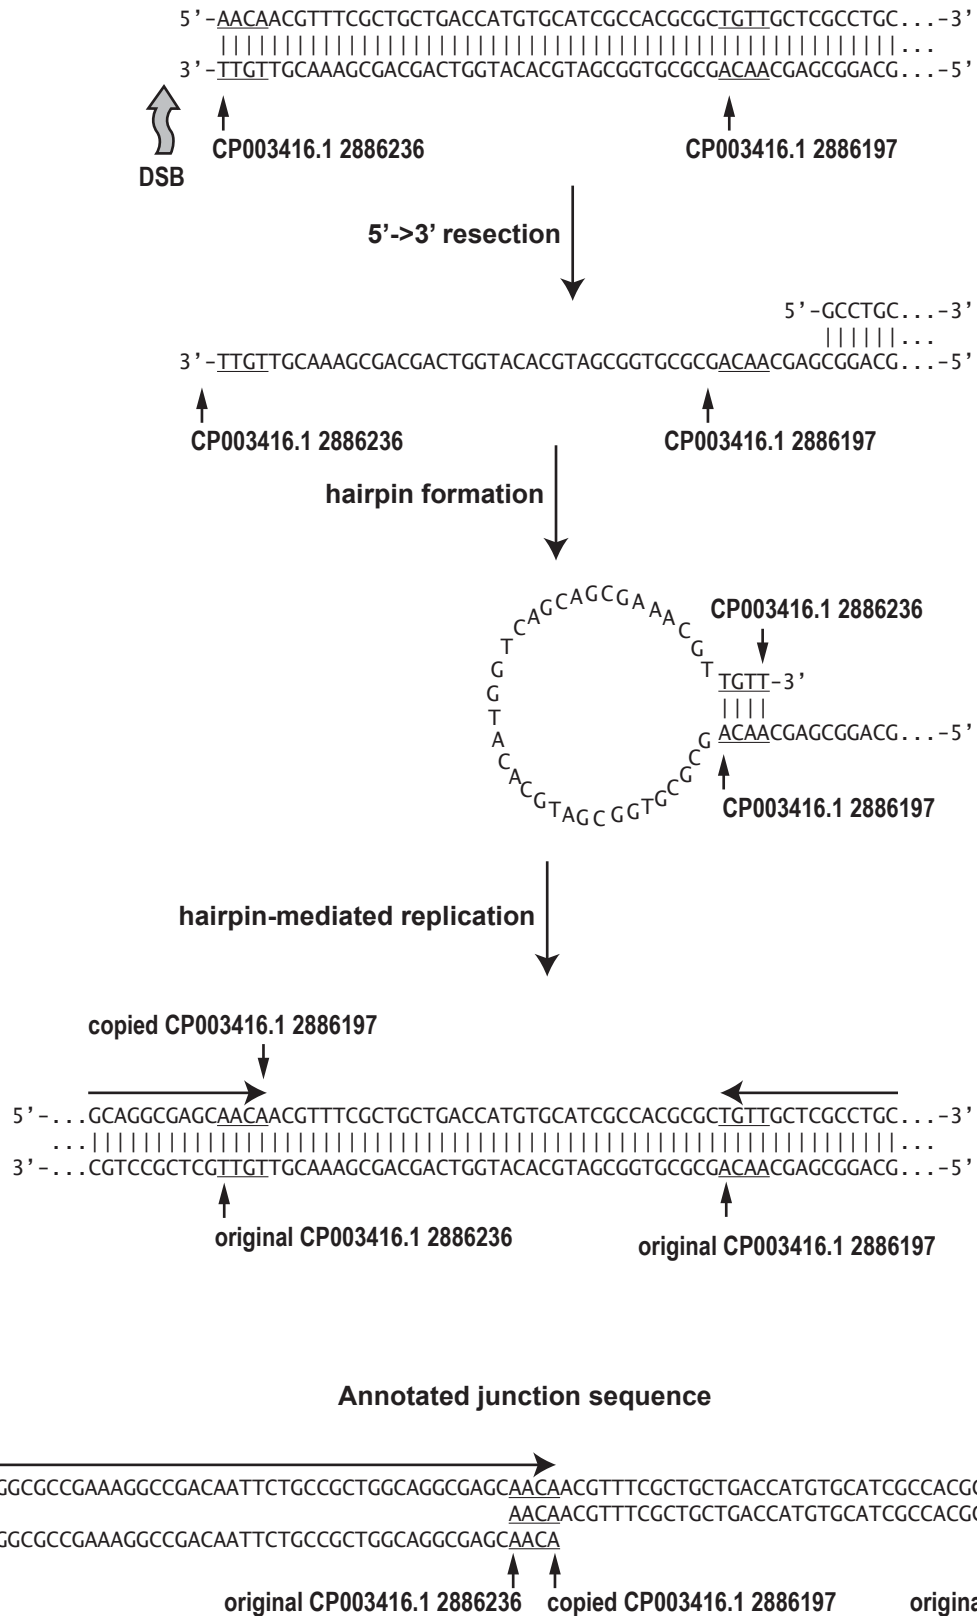

Putnam et al. 2014. Figure S5 G.

Isolate 3255 (from wild-type uGCR assay strain)

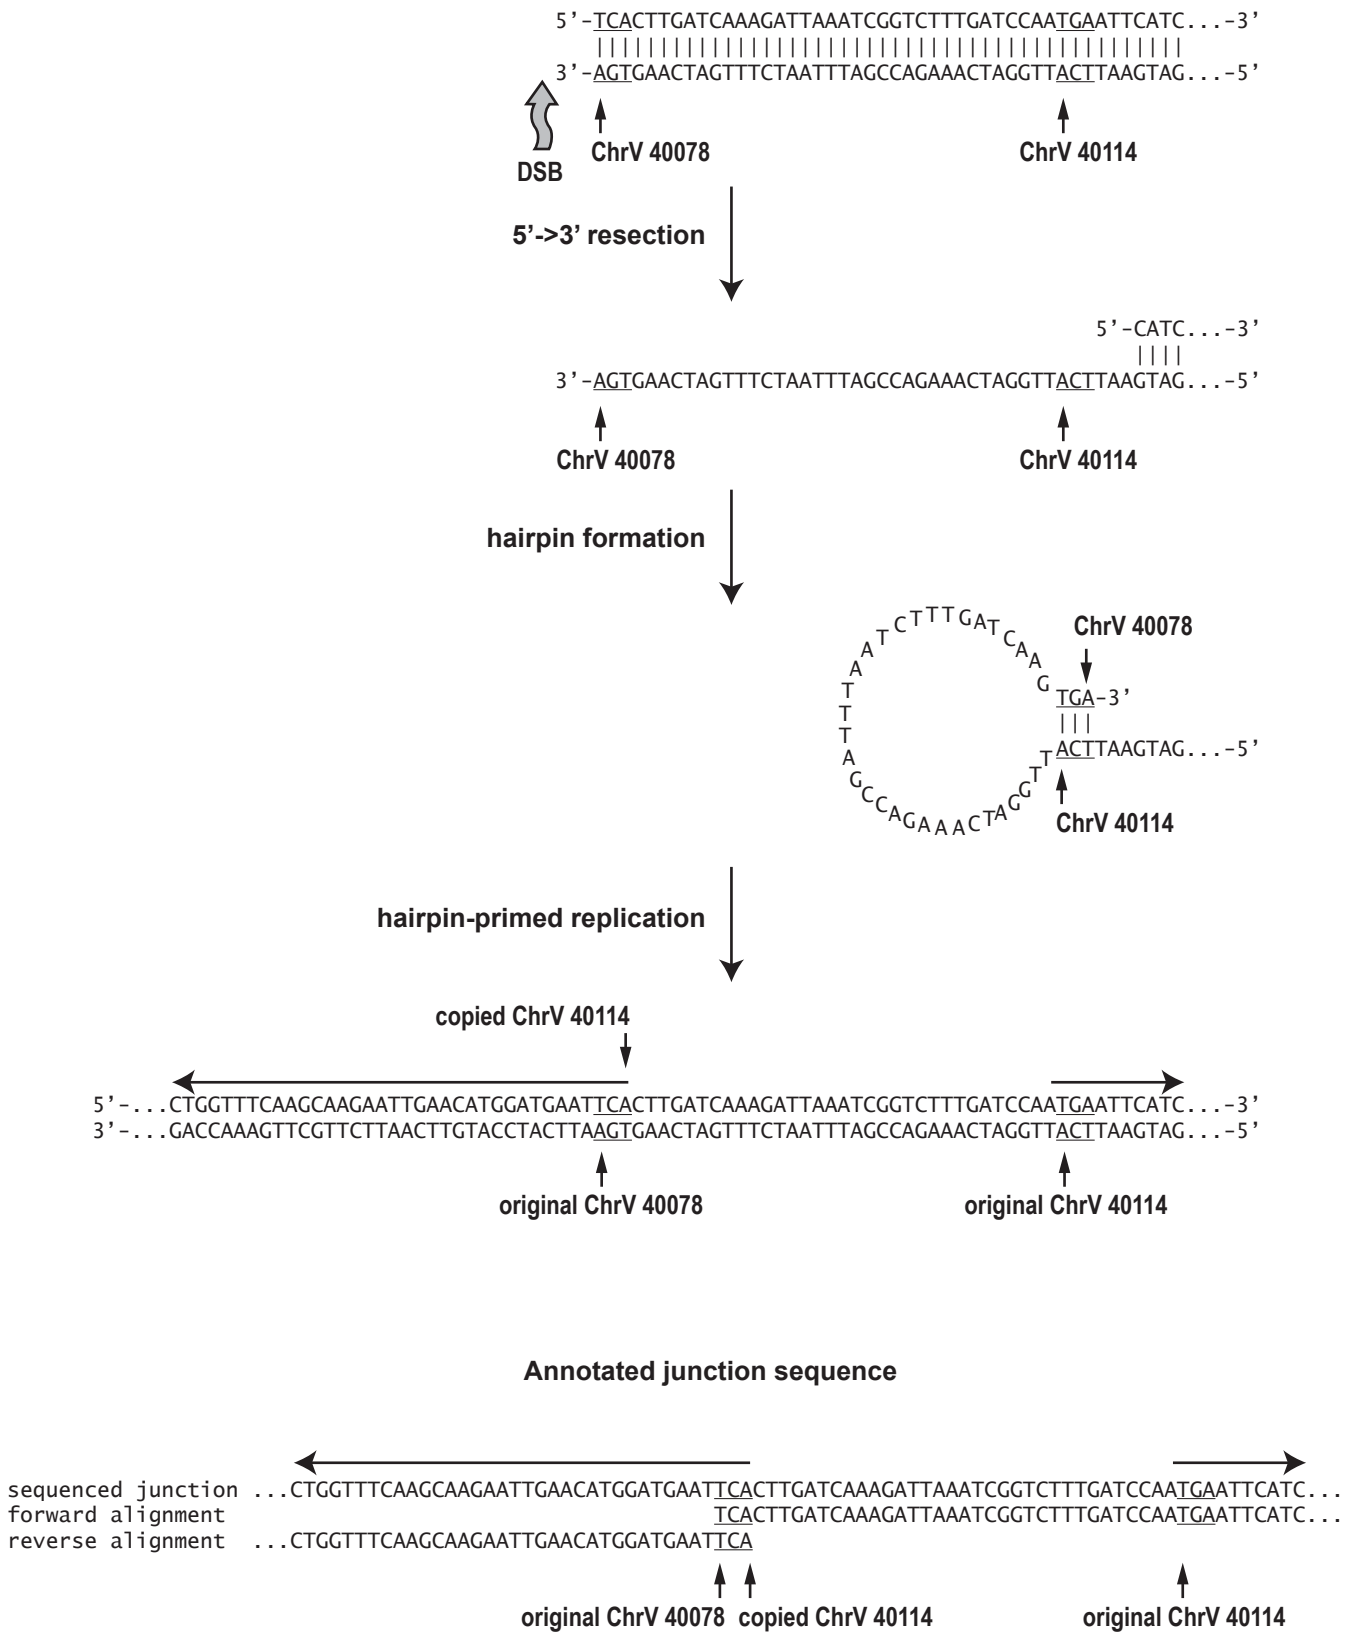

Supplement: pgen.1004277.s005.pdf [file pgen.1004277.s005.pdf]
