# Supplementary material for: DNA Repair Pathway Selection Caused by Defects in TEL1, SAE2, and De Novo Telomere Addition Generates Specific Chromosomal Rearrangement Signatures
Source: PubMed Central journal article supplement (PMC3974649; doi:10.1371/journal.pgen.1004277), 2014-04-03
Supplement: pgen.1004277.s006.pdf [file pgen.1004277.s006.pdf]

**A**

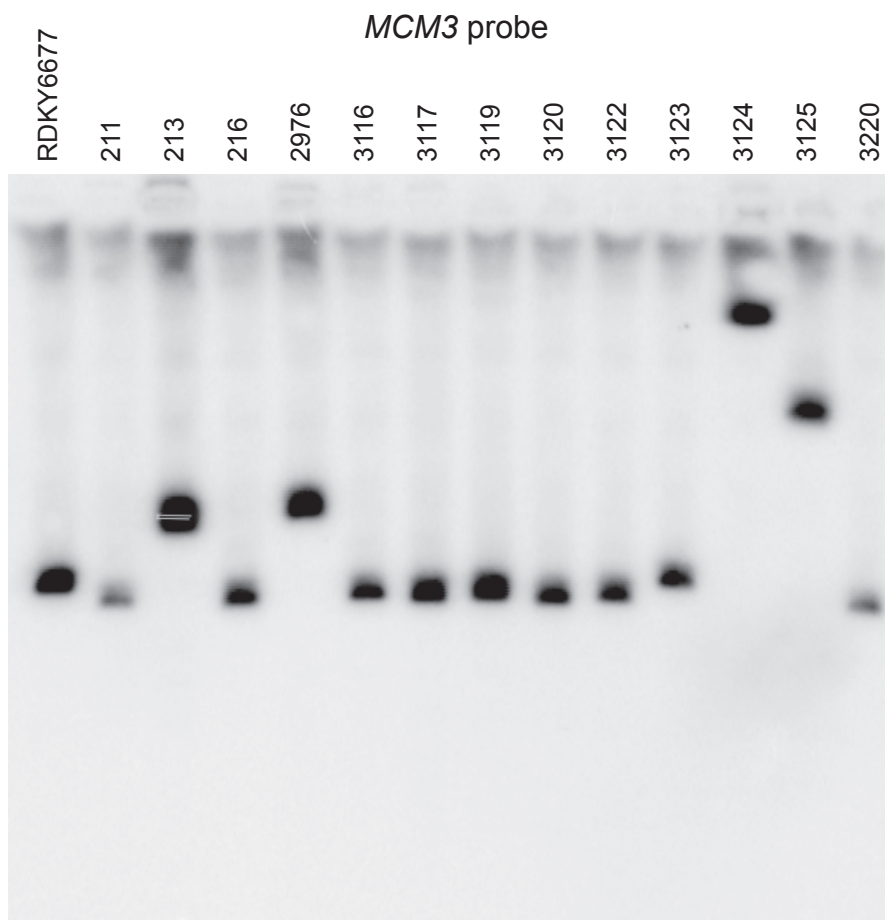

**B**

ChrV 28264:

GGTGTGATGATAA:ATG:GTAAAGCTGGAATGAAT

216 GGTGTGATGATAA:ATG:TGAATGTTGAGATAATT

:ATG:TGAATGTTGAGATAATT

:YJRWty1-2(YJRWdelta13) or

:YGRWty1-1(YGRWdelta14)

  

ChrV 26402:

3116 TGTACGTCTGAATGTC:GG:TGTGGGTGTG

  

ChrV 40403:

3117 GACGCCACCGCACTTTATC:GGGT:GGGTGTGGTGTGTGGGTGTGGTGTGTGGGT

  

ChrV 39764:

3120 TGAATCAAATGTTTTTCGTTTTTC:GTGTGTGG:GTGTGGTGTGTGT
