# Supplementary material for: DNA Repair Pathway Selection Caused by Defects in TEL1, SAE2, and De Novo Telomere Addition Generates Specific Chromosomal Rearrangement Signatures
Source: PubMed Central journal article supplement (PMC3974649; doi:10.1371/journal.pgen.1004277), 2014-04-03

Putnam et al. 2014. Figure S7.

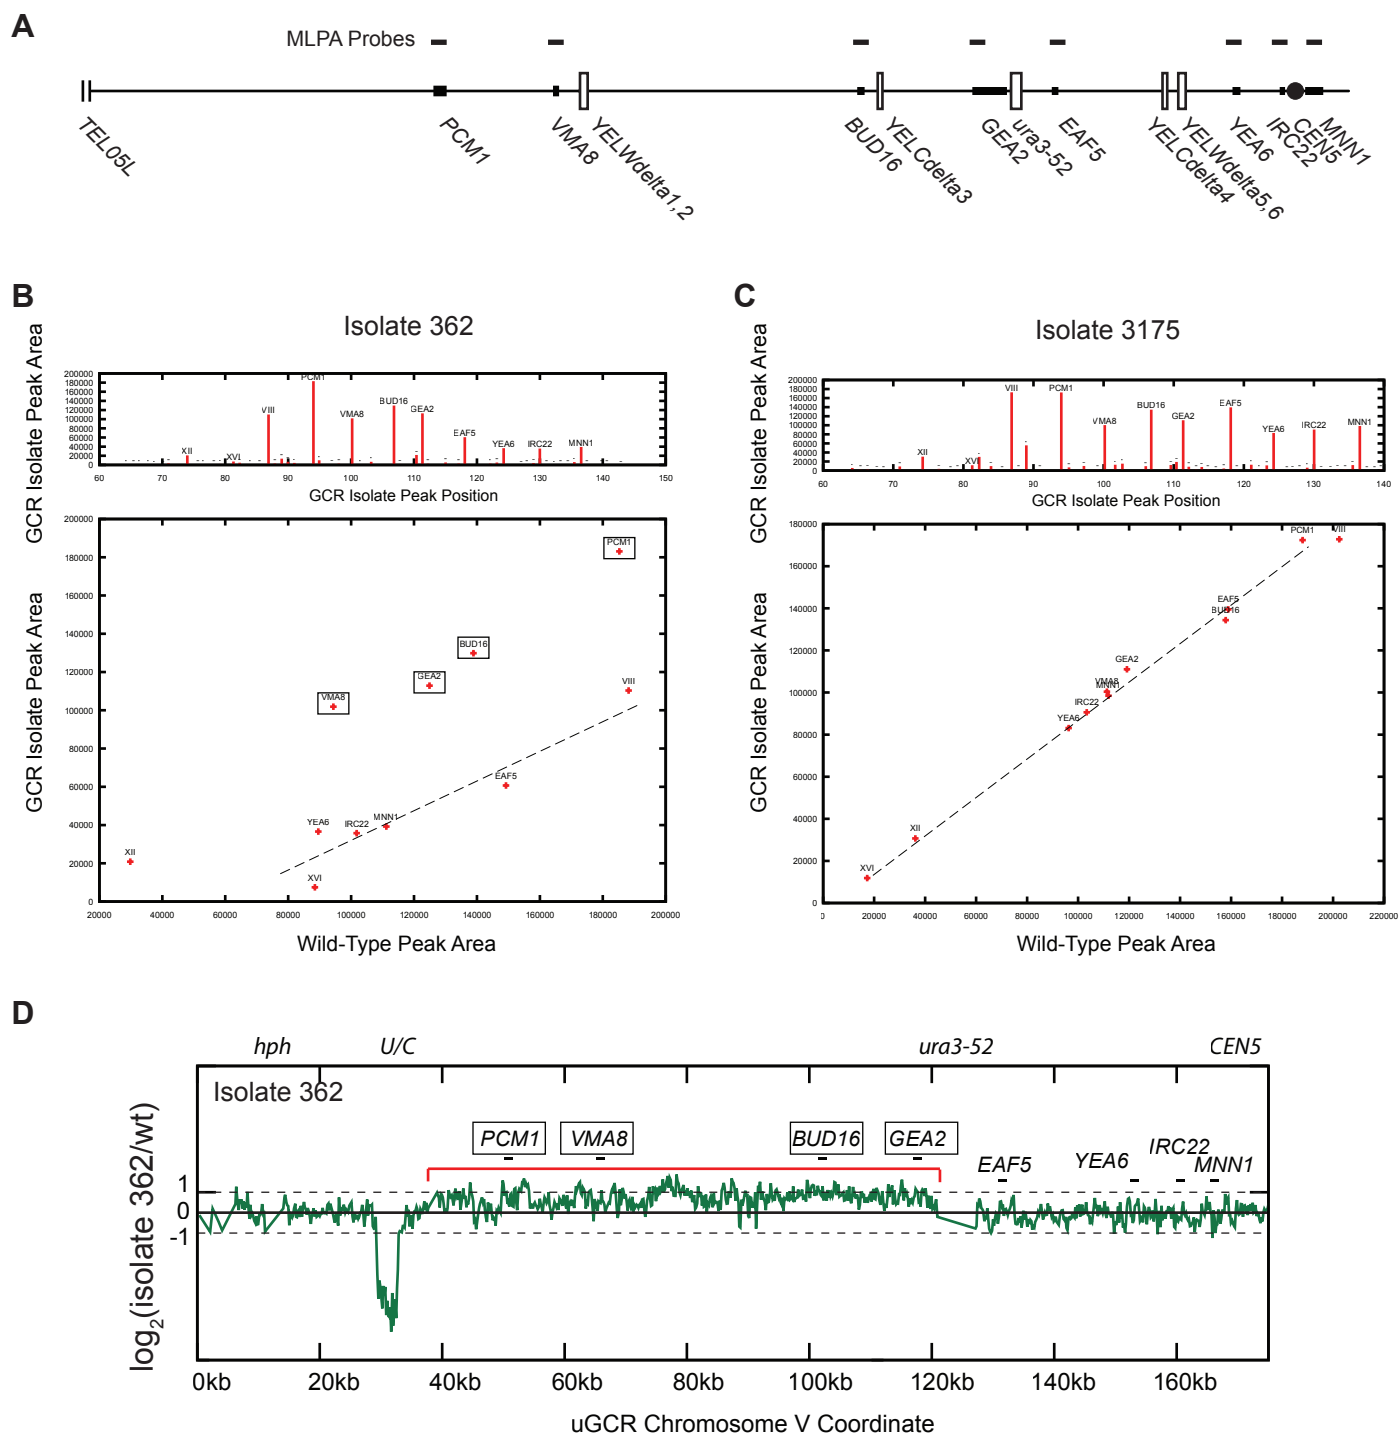

Supplement: pgen.1004277.s007.pdf [file pgen.1004277.s007.pdf]
