# Supplementary material for: DNA Repair Pathway Selection Caused by Defects in TEL1, SAE2, and De Novo Telomere Addition Generates Specific Chromosomal Rearrangement Signatures
Source: PubMed Central journal article supplement (PMC3974649; doi:10.1371/journal.pgen.1004277), 2014-04-03
Supplement: pgen.1004277.s010.pdf [file pgen.1004277.s010.pdf]

**Putnam et al. 2014. Supplemental Table 1. Statistics for Next Generation Sequencing results.**

| Sample       | No. Read Pairs*         | No. Uniquely Mapping Read Pairs | Median Intra-Read Pair Distance (bp) |
|--------------|-------------------------|---------------------------------|--------------------------------------|
| RDKY6761     | 6,790,544 (9,763,765)   | 5,202,261                       | 348                                  |
| isolate 213  | 1,620,637 (1,666,387)   | 1,126,340                       | 488                                  |
| isolate 217  | 16,453,691 (19,084,799) | 13,377,250                      | 324                                  |
| isolate 218  | 6,530,448 (6,626,828)   | 4,438,139                       | 525                                  |
| isolate 362  | 56,076,913 (84,345,281) | 35,187,865                      | 544                                  |
| isolate 364  | 11,908,333 (13,904,325) | 9,478,272                       | 346                                  |
| isolate 365  | 16,614,757 (19,002,149) | 13,559,892                      | 342                                  |
| isolate 366  | 10,194,633 (16,590,843) | 7,539,510                       | 337                                  |
| isolate 2977 | 10,752,560 (16,356,597) | 8,028,543                       | 336                                  |
| isolate 3118 | 11,333,616 (14,827,179) | 8,920,560                       | 349                                  |
| isolate 3121 | 5,311,381 (5,364,880)   | 4,093,630                       | 521                                  |
| isolate 3124 | 7,549,579 (9,568,626)   | 3,835,490                       | 483                                  |
| isolate 3125 | 6,406,402 (7,047,941)   | 3,772,812                       | 487                                  |
| isolate 3178 | 5,902,900 (5,946,098)   | 4,607,977                       | 522                                  |
| isolate 3255 | 6,143,074 (6,199,015)   | 4,809,048                       | 537                                  |

\*Numbers in parentheses indicate the number of read pairs prior to culling PCR duplicates. All reads were 50 bases long.
