# Supplementary material for: DNA Repair Pathway Selection Caused by Defects in TEL1, SAE2, and De Novo Telomere Addition Generates Specific Chromosomal Rearrangement Signatures
Source: PubMed Central journal article supplement (PMC3974649; doi:10.1371/journal.pgen.1004277), 2014-04-03
Supplement: pgen.1004277.s011.pdf [file pgen.1004277.s011.pdf]

**Putnam et al. 2014. Supplemental Table 2. Number of junction-defining read pairs and junction-sequencing reads for isolates with sequenced genomes.**

| Sample       | Relevant Genotype | <i>hph</i> status | GCR-related junction* | GCR Description                                                     |
|--------------|-------------------|-------------------|-----------------------|---------------------------------------------------------------------|
| RDKY6761     | <i>tell::HIS3</i> | +                 | n.a.                  | No GCR (starting strain)                                            |
| isolate 213  | <i>tell::HIS3</i> | -                 | 3/0                   | ChrVL Inversion (in <i>PRB1</i> )                                   |
| isolate 217  | <i>tell::HIS3</i> | +                 | 63/116                | ChrVL Inversion (in <i>PRB1</i> )                                   |
| isolate 218  | <i>tell::HIS3</i> | +                 | 0/31                  | ChrVL Inversion (in interrupted <i>YEL068C</i> )                    |
| isolate 362  | <i>tell::HIS3</i> | +                 | 58/287                | ChrVL Inversion (in interrupted <i>YEL068C</i> )                    |
| isolate 364  | <i>tell::HIS3</i> | +                 | 33/131                | ChrVL Inversion (in interrupted <i>YEL068C</i> )                    |
| isolate 365  | <i>tell::HIS3</i> | +                 | 35/93                 | ChrVL Inversion (in <i>SOM1-PRB1</i> intergenic region)             |
| isolate 366  | <i>tell::HIS3</i> | +                 | 32/101                | ChrVL Inversion (in interrupted <i>YEL068C</i> )                    |
| isolate 2977 | <i>tell::HIS3</i> | +                 | 29/42                 | ChrVL Inversion (in <i>can1::hisG</i> )                             |
| isolate 3118 | <i>tell::HIS3</i> | +                 | 572/114               | ChrVL Interstitial deletion (between <i>HXT13</i> and <i>AVT2</i> ) |
| isolate 3121 | <i>tell::HIS3</i> | +                 | 7/26                  | ChrVL Inversion (in <i>can1::hisG</i> )                             |
| isolate 3124 | <i>tell::HIS3</i> | -                 | 10/25                 | ChrVL Inversion (in <i>CAN1</i> )                                   |
| isolate 3125 | <i>tell::HIS3</i> | -                 | 1/15                  | ChrVL Inversion (in <i>can1::hisG</i> )                             |
| isolate 3178 | wild-type         | +                 | 36/39                 | ChrVL Inversion (in <i>PRB1</i> )                                   |
| isolate 3255 | wild-type         | +                 | 160/8                 | ChrVL Interstitial deletion (in <i>CAN1/URA3</i> cassette)          |

| Sample       | ChrV/ <i>hph</i> telomeric junction | ChrV/ <i>hph</i> centromeric junction | <i>URA3/YEL068C</i> junction | <i>URA3/CAN1</i> junction | <i>CAN1/YEL068C</i> junction |
|--------------|-------------------------------------|---------------------------------------|------------------------------|---------------------------|------------------------------|
| RDKY6761     | 341/125                             | 309/82                                | 369/184                      | 349/174                   | 353/149                      |
| isolate 213  | 0/0                                 | 0/0                                   | 0/0                          | 0/0                       | 0/0                          |
| isolate 217  | 720/184                             | 644/206                               | 656/373                      | 0/0                       | 0/0                          |
| isolate 218  | 99/24                               | 213/42                                | 107/41                       | 0/0                       | 0/0                          |
| isolate 362  | 1252/330                            | 1546/262                              | 1416/435                     | 0/0                       | 0/0                          |
| isolate 364  | 660/167                             | 654/190                               | 628/278                      | 0/0                       | 0/0                          |
| isolate 365  | 658/165                             | 654/204                               | 644/307                      | 0/0                       | 0/0                          |
| isolate 366  | 476/142                             | 445/121                               | 436/241                      | 0/0                       | 0/0                          |
| isolate 2977 | 545/151                             | 504/136                               | 529/230                      | 0/0                       | 0/0                          |
| isolate 3118 | 598/127                             | 501/147                               | 0/0                          | 0/0                       | 0/0                          |
| isolate 3121 | 174/43                              | 197/53                                | 162/43                       | 0/0                       | 0/0                          |
| isolate 3124 | 0/0                                 | 0/0                                   | 0/0                          | 0/0                       | 161/64                       |
| isolate 3125 | 0/0                                 | 0/0                                   | 0/0                          | 0/0                       | 0/0                          |
| isolate 3178 | 148/32                              | 202/48                                | 131/43                       | 0/0                       | 0/0                          |
| isolate 3255 | 187/42                              | 217/45                                | 213/40                       | 0/0                       | 175/60                       |

| Sample       | <i>can1::hisG</i><br>telomeric junction | <i>can1::hisG</i><br>centromeric<br>junction | <i>tell::HIS3</i><br>centromeric<br>junction | <i>tell::HIS3</i><br>telomeric<br>junction | <i>trp1Δ63</i><br>interstitial<br>deletion |
|--------------|-----------------------------------------|----------------------------------------------|----------------------------------------------|--------------------------------------------|--------------------------------------------|
|              |                                         |                                              |                                              |                                            |                                            |
| RDKY6761     | 236/168                                 | 304/143                                      | 348/201                                      | 230/157                                    | 35/13                                      |
| isolate 213  | 0/0                                     | 0/0                                          | 18/11                                        | 14/13                                      | 12/7                                       |
| isolate 217  | 0/0                                     | 0/0                                          | 623/436                                      | 394/306                                    | 120/36                                     |
| isolate 218  | 508/312                                 | 272/96                                       | 85/36                                        | 53/36                                      | 80/32                                      |
| isolate 362  | 2270/1250                               | 2246/922                                     | 1273/322                                     | 745/529                                    | 1008/282                                   |
| isolate 364  | 806/544                                 | 826/510                                      | 547/518                                      | 323/343                                    | 71/18                                      |
| isolate 365  | 0/0                                     | 0/0                                          | 488/377                                      | 320/256                                    | 180/46                                     |
| isolate 366  | 477/418                                 | 518/402                                      | 416/277                                      | 261/237                                    | 61/15                                      |
| isolate 2977 | 0/0                                     | 562/408                                      | 515/285                                      | 290/217                                    | 49/5                                       |
| isolate 3118 | 456/378                                 | 444/248                                      | 521/318                                      | 297/245                                    | 93/24                                      |
| isolate 3121 | 0/0                                     | 303/130                                      | 120/42                                       | 107/58                                     | 95/36                                      |
| isolate 3124 | 195/143                                 | 181/82                                       | 207/62                                       | 108/94                                     | 81/18                                      |
| isolate 3125 | 0/0                                     | 219/98                                       | 159/59                                       | 81/61                                      | 88/28                                      |
|              |                                         |                                              |                                              |                                            |                                            |
| isolate 3178 | 0/0                                     | 0/0                                          | n.a.                                         | n.a.                                       | 89/21                                      |
| isolate 3255 | 194/110                                 | 163/82                                       | n.a.                                         | n.a.                                       | 169/37                                     |

| Sample       | circular<br>2-micron<br>plasmid | circular<br>mitochondrial<br>genome | <i>ade2::hisG</i><br>centromeric<br>junction | <i>ade2::hisG</i><br>telomeric<br>junction | <i>MATa</i><br>centromeric<br>junction* | <i>MATa</i><br>telomeric<br>junction* |
|--------------|---------------------------------|-------------------------------------|----------------------------------------------|--------------------------------------------|-----------------------------------------|---------------------------------------|
|              |                                 |                                     |                                              |                                            |                                         |                                       |
| RDKY6761     | 132/21                          | 46/28                               | 23/6                                         | 29/13                                      | 15/9                                    | 120/0                                 |
| isolate 213  | 759/179                         | 0/0                                 | 19/6                                         | 22/7                                       | 0/0                                     | 11/0                                  |
| isolate 217  | 635/131                         | 184/99                              | 132/30                                       | 119/34                                     | 17/49                                   | 153/0                                 |
| isolate 218  | 5010/n.d.                       | 0/0                                 | 78/39                                        | 85/34                                      | 0/0                                     | 55/0                                  |
| isolate 362  | n.d.                            | n.d.                                | 1059/308                                     | 1026/250                                   | 737/5                                   | 9/0                                   |
| isolate 364  | 320/79                          | 53/34                               | 70/17                                        | 57/12                                      | 13/19                                   | 170/0                                 |
| isolate 365  | 706/156                         | 143/80                              | 206/39                                       | 186/56                                     | 13/21                                   | 142/0                                 |
| isolate 366  | 248/62                          | 94/49                               | 41/22                                        | 47/17                                      | 18/46                                   | 114/0                                 |
| isolate 2977 | 188/67                          | 139/72                              | 66/13                                        | 55/17                                      | 17/37                                   | 145/0                                 |
| isolate 3118 | 248/45                          | 154/68                              | 70/29                                        | 71/29                                      | 11/26                                   | 173/0                                 |
| isolate 3121 | 5362/n.d.                       | 0/0                                 | 105/26                                       | 146/37                                     | 0/0                                     | 67/0                                  |
| isolate 3124 | 7948/1210                       | 0/0                                 | 101/66                                       | 88/46                                      | 0/0                                     | 83/0                                  |
| isolate 3125 | 3119/574                        | 10/15                               | 107/29                                       | 107/28                                     | 1/0                                     | 66/0                                  |
|              |                                 |                                     |                                              |                                            |                                         |                                       |
| isolate 3178 | 21/25                           | 0/0                                 | 129/28                                       | 66/39                                      | 0/0                                     | 69/0                                  |
| isolate 3255 | 5893/n.d.                       | 0/0                                 | 143/23                                       | 140/27                                     | 0/0                                     | 104/0                                 |

| Sample       | <i>leu2Δ1</i><br>interstitial<br>deletion | <i>his3Δ200</i><br>interstitial<br>deletion |
|--------------|-------------------------------------------|---------------------------------------------|
|              |                                           |                                             |
| RDKY6761     | 281/68                                    | 30/9                                        |
| isolate 213  | 29/4                                      | 23/10                                       |
| isolate 217  | 600/155                                   | 109/0                                       |
| isolate 218  | 120/24                                    | 91/38                                       |
| isolate 362  | 861/234                                   | 1049/661                                    |
| isolate 364  | 475/139                                   | 84/0                                        |
| isolate 365  | 544/147                                   | 201/72                                      |
| isolate 366  | 374/107                                   | 49/35                                       |
| isolate 2977 | 399/123                                   | 55/22                                       |
| isolate 3118 | 426/106                                   | 89/0                                        |
| isolate 3121 | 133/20                                    | 137/33                                      |
| isolate 3124 | 179/43                                    | 88/28                                       |
| isolate 3125 | 125/35                                    | 87/40                                       |
|              |                                           |                                             |
| isolate 3178 | 117/21                                    | 132/55                                      |
| isolate 3255 | 190/36                                    | 167/43                                      |

\*Results are reported as the number of junction-defining read pairs before the slash and the number of junction-sequencing reads after the slash. *MATa* associated rearrangements were identified as the reference genome is from a *MATa* strain. n.a., not applicable. n.d., not determined. Junctions with 0 junction-defining reads were found by alignment of non-mapping junction-sequencing reads but not through identification of junction-defining reads.
