# Supplementary material for: DNA Repair Pathway Selection Caused by Defects in TEL1, SAE2, and De Novo Telomere Addition Generates Specific Chromosomal Rearrangement Signatures
Source: PubMed Central journal article supplement (PMC3974649; doi:10.1371/journal.pgen.1004277), 2014-04-03
Supplement: pgen.1004277.s012.pdf [file pgen.1004277.s012.pdf]

**Putnam et al. 2014. Supplementary Table 3. Yeast strains.**

| <i>Name</i> | <i>Genotype</i>                                                                                                      | <i>Reference</i>   |
|-------------|----------------------------------------------------------------------------------------------------------------------|--------------------|
| RDKY6677    | <i>MATa leu2Δ1 trp1Δ63 his3Δ200 lys2ΔBgl hom3-10 ade2Δ1 ade8 ura3-52 iYEL072W::hph can1::hisG yel068c::CAN1/URA3</i> | Putnam et al. 2009 |
| RDKY6678    | <i>MATa leu2Δ1 trp1Δ63 his3Δ200 lys2ΔBgl hom3-10 ade2Δ1 ade8 ura3-52 iYEL072W::hph can1::hisG yel072w::CAN1/URA3</i> | Putnam et al. 2009 |
| RDKY6764    | RDKY6677 <i>chk1::HIS3</i>                                                                                           | Putnam et al. 2009 |
| RDKY6727    | RDKY6677 <i>ctf18::TRP1</i>                                                                                          | Putnam et al. 2009 |
| RDKY6763    | RDKY6677 <i>dun1::HIS3</i>                                                                                           | Putnam et al. 2009 |
| RDKY8000    | RDKY6677 <i>est1::G418</i>                                                                                           | This study         |
| RDKY8002    | RDKY6677 <i>est3::G418</i>                                                                                           | This study         |
| RDKY6729    | RDKY6677 <i>exo1::HIS3</i>                                                                                           | Putnam et al. 2009 |
| RDKY8032    | RDKY6677 <i>exo1::TRP1 sgs1::HIS3</i>                                                                                | This study         |
| RDKY8010    | RDKY6677 <i>hta1-S129X.hisG hta2-S129X.hisG</i>                                                                      | This study         |
| RDKY8012    | RDKY6677 <i>lig4::HIS3</i>                                                                                           | This study         |
| RDKY8014    | RDKY6677 <i>lig4::G418 tel1::HIS3</i>                                                                                | This study         |
| RDKY6760    | RDKY6677 <i>mec1::HIS3 sml1::G418</i>                                                                                | Putnam et al. 2009 |
| RDKY6730    | RDKY6677 <i>mrc1::TRP1</i>                                                                                           | Putnam et al. 2009 |
| RDKY6779    | RDKY6677 <i>mrc1::TRP1 tof1::HIS3</i>                                                                                | Putnam et al. 2009 |
| RDKY6766    | RDKY6677 <i>mrc1-aq.TRP1</i>                                                                                         | Putnam et al. 2009 |
| RDKY6848    | RDKY6677 <i>mrc1-aq.TRP1 tof1::HIS3</i>                                                                              | Putnam et al. 2009 |
| RDKY6686    | RDKY6677 <i>mre11::HIS3</i>                                                                                          | Putnam et al. 2009 |
| RDKY8154    | RDKY6677 <i>mre11::G418 tel1::HIS3</i>                                                                               | This study         |
| RDKY6894    | RDKY6677 <i>pif1::HIS3</i>                                                                                           | Putnam et al. 2009 |
| RDKY8008    | RDKY6677 <i>pif1::HIS3 tel1::HIS3</i>                                                                                | This study         |
| RDKY6759    | RDKY6677 <i>rad24::HIS3</i>                                                                                          | Putnam et al. 2009 |
| RDKY6691    | RDKY6677 <i>rad52::HIS3</i>                                                                                          | Putnam et al. 2009 |
| RDKY8016    | RDKY6677 <i>rad52::G418 tel1::HIS3</i>                                                                               | This study         |
| RDKY6762    | RDKY6677 <i>rad53::HIS3 sml1::G418</i>                                                                               | Putnam et al. 2009 |
| RDKY6737    | RDKY6677 <i>sae2::TRP1</i>                                                                                           | Putnam et al. 2009 |
| RDKY8020    | RDKY6677 <i>sae2::TRP1 exo1::HIS3</i>                                                                                | This study         |
| RDKY8022    | RDKY6677 <i>sae2::TRP1 rad52::HIS3</i>                                                                               | This study         |
| RDKY8018    | RDKY6677 <i>sae2::TRP1 tel1::HIS3</i>                                                                                | This study         |
| RDKY6687    | RDKY6677 <i>sgs1::HIS3</i>                                                                                           | Putnam et al. 2009 |
| RDKY8030    | RDKY6677 <i>sir4::HIS3</i>                                                                                           | This study         |
| RDKY6740    | RDKY6677 <i>slx5::TRP1</i>                                                                                           | Putnam et al. 2009 |
| RDKY6846    | RDKY6677 <i>slx8::G418</i>                                                                                           | Putnam et al. 2009 |
| RDKY6761    | RDKY6677 <i>tel1::HIS3</i>                                                                                           | Putnam et al. 2009 |
| RDKY6767    | RDKY6677 <i>tof1::HIS3</i>                                                                                           | Putnam et al. 2009 |
| RDKY8155    | RDKY6677 <i>xrs2-11.HIS3</i>                                                                                         | This study         |
| RDKY8004    | RDKY6677 <i>yku70::HIS3</i>                                                                                          | This study         |
| RDKY8006    | RDKY6677 <i>yku80::HIS3</i>                                                                                          | This study         |
| RDKY6773    | RDKY6678 <i>chk1::HIS3</i>                                                                                           | Putnam et al. 2009 |
| RDKY6744    | RDKY6678 <i>ctf18::HIS3</i>                                                                                          | Putnam et al. 2009 |
| RDKY6772    | RDKY6678 <i>dun1::HIS3</i>                                                                                           | Putnam et al. 2009 |
| RDKY8001    | RDKY6678 <i>est1::G418</i>                                                                                           | This study         |
| RDKY8003    | RDKY6678 <i>est3::G418</i>                                                                                           | This study         |
| RDKY6746    | RDKY6678 <i>exo1::HIS3</i>                                                                                           | Putnam et al. 2009 |
| RDKY8033    | RDKY6678 <i>exo1::TRP1 sgs1::HIS3</i>                                                                                | This study         |
| RDKY8011    | RDKY6678 <i>hta1-S129X.hisG hta2-S129X.hisG</i>                                                                      | This study         |

|          |                                         |                    |
|----------|-----------------------------------------|--------------------|
| RDKY8013 | RDKY6678 <i>lig4::HIS3</i>              | This study         |
| RDKY8015 | RDKY6678 <i>lig4::G418 tel1::HIS3</i>   | This study         |
| RDKY6769 | RDKY6678 <i>mec1::HIS3 sml1::G418</i>   | Putnam et al. 2009 |
| RDKY6747 | RDKY6678 <i>mrc1::TRP1</i>              | Putnam et al. 2009 |
| RDKY6780 | RDKY6678 <i>mrc1::TRP1 tof1::HIS3</i>   | Putnam et al. 2009 |
| RDKY6775 | RDKY6678 <i>mrc1-aq.TRP1</i>            | Putnam et al. 2009 |
| RDKY6849 | RDKY6678 <i>mrc1-aq.TRP1 tof1::HIS3</i> | Putnam et al. 2009 |
| RDKY6689 | RDKY6678 <i>mre11::HIS3</i>             | Putnam et al. 2009 |
| RDKY8155 | RDKY6678 <i>mre11::G418 tel1::HIS3</i>  | This study         |
| RDKY6936 | RDKY6678 <i>pif1::HIS3</i>              | Putnam et al. 2009 |
| RDKY8009 | RDKY6678 <i>pif1::HIS3 tel1::HIS3</i>   | This study         |
| RDKY6768 | RDKY6678 <i>rad24::HIS3</i>             | Putnam et al. 2009 |
| RDKY6708 | RDKY6678 <i>rad52::HIS3</i>             | Putnam et al. 2009 |
| RDKY8017 | RDKY6678 <i>rad52::G418 tel1::HIS3</i>  | This study         |
| RDKY6771 | RDKY6678 <i>rad53::HIS3 sml1::G418</i>  | Putnam et al. 2009 |
| RDKY6754 | RDKY6678 <i>sae2::TRP1</i>              | Putnam et al. 2009 |
| RDKY8021 | RDKY6678 <i>sae2::TRP1 exo1::HIS3</i>   | This study         |
| RDKY8023 | RDKY6678 <i>sae2::TRP1 rad52::HIS3</i>  | This study         |
| RDKY8019 | RDKY6678 <i>sae2::TRP1 tel1::HIS3</i>   | This study         |
| RDKY6690 | RDKY6678 <i>sgs1::HIS3</i>              | Putnam et al. 2009 |
| RDKY8031 | RDKY6678 <i>sir4::HIS3</i>              | This study         |
| RDKY6757 | RDKY6678 <i>slx5::TRP1</i>              | Putnam et al. 2009 |
| RDKY6847 | RDKY6678 <i>slx8::G418</i>              | Putnam et al. 2009 |
| RDKY6770 | RDKY6678 <i>tel1::HIS3</i>              | Putnam et al. 2009 |
| RDKY6776 | RDKY6678 <i>tof1::HIS3</i>              | Putnam et al. 2009 |
| RDKY8157 | RDKY6678 <i>xrs2-11.HIS3</i>            | This study         |
| RDKY8005 | RDKY6678 <i>yku70::HIS3</i>             | This study         |
| RDKY8007 | RDKY6678 <i>yku80::HIS3</i>             | This study         |
