# Supplementary material for: DNA Repair Pathway Selection Caused by Defects in TEL1, SAE2, and De Novo Telomere Addition Generates Specific Chromosomal Rearrangement Signatures
Source: PubMed Central journal article supplement (PMC3974649; doi:10.1371/journal.pgen.1004277), 2014-04-03
Supplement: pgen.1004277.s013.pdf [file pgen.1004277.s013.pdf]

**Putnam et al. 2014. Supplemental Table 4. MLPA primers.**

| Gene         | Primer sequences*                                                            | Location**                                  | Product Size (bp) |
|--------------|------------------------------------------------------------------------------|---------------------------------------------|-------------------|
| <i>ORC3</i>  | gggttcacctaaagggttggaAAGATGAACGTC<br>AGCGAGTT                                | ChrXII 141097-141116                        | 78                |
|              | P-<br>TGCTGACGCCCAAAGGtctagattggatctt<br>gctggcac                            | ChrXII 141117-141132                        |                   |
| <i>TFC8</i>  | gggttcacctaaagggttggaTTTCTCGAGGAA<br>ACGTTCAATTT                             | ChrXVI 542345-542323                        | 84                |
|              | P-<br>AGAAAGCTTCACGGCTGACTctagattggat<br>cttgctggcac                         | ChrXVI 542322-542304                        |                   |
| <i>DED81</i> | gggttcacctaaagggttggaTACCTGGTTGAA<br>CGAACACGACATCA                          | ChrVIII 142350-142325                       | 90                |
|              | P-<br>AGAACGAAGAGGGCGAAGACTTtctagattg<br>gatcttgctggcac                      | ChrVIII 142324-142303                       |                   |
| <i>PCMI</i>  | gggttcacctaaagggttggaGCCAATGGTATC<br>GGTGGTCCACAGTTGAA                       | ChrV 43936-43964<br>ChrV-u 48729-48757      | 96                |
|              | P-<br>AAAACACTACTGGCCTCCGAAGATTGGtctaga<br>ttggatcttgctggcac                 | ChrV 43965-43989<br>ChrV-u 48758-48782      |                   |
| <i>VMA8</i>  | gggttcacctaaagggttggaGATGCTAAGCAA<br>AAGATGGGGAGAGTTATGCA                    | ChrV 58531-58562<br>ChrV-u 63324-63355      | 102               |
|              | P-<br>AACTGCTGCCTTTTCTGGCCGAAGTTtct<br>agattggatcttgctggcac                  | ChrV 58563-58590<br>ChrV-u 63356-63383      |                   |
| <i>BUD16</i> | gggttcacctaaagggttggaGTACATGGATAT<br>GTGGGAAATAAGGCTGCAACGTT                 | ChrV 97763-97729<br>ChrV-u 102556-102522    | 108               |
|              | P-<br>TCCCTTACAGTGTCTAGGCTGGGATGTGGAT<br>tctagattggatcttgctggcac             | ChrV 97698-97728<br>ChrV-u 102521-102491    |                   |
| <i>GEA2</i>  | gggttcacctaaagggttggaGAGGAAGCTATT<br>AGCGAGGACGATGGCATTGAAGAAGA              | ChrV 112258-112295<br>ChrV-u 117051-117088  | 114               |
|              | P-<br>GCATATTCATTCAGAGAAGAGCACAAATGGC<br>GCCTctagattggatcttgctggcac          | ChrV 112296-112329<br>ChrV-u 117089-117122  |                   |
| <i>EAF5</i>  | gggttcacctaaagggttggaCTGCAGCTGATT<br>CTTCAAAGAGCATAACGGACGGTGTAAT            | ChrV 122173-122213<br>ChrV-u 132890-132930  | 120               |
|              | P-<br>GCGAAAGGTCATTGGTACGGACGACTGGAAA<br>TTGGCTtctagattggatcttgctggcac       | ChrV 122214-122250<br>ChrV-u 132931-132967  |                   |
| <i>YEA6</i>  | gggttcacctaaagggttggaCTAAATAGGCTG<br>AAAAAGAATGCTGACCCTAGAGTTGCTGCAA<br>T    | ChrV 144411-144454<br>ChrV-u 155127-155170  | 126               |
|              | P-<br>TTCAGGTGCTTTATCTGGTGCCTATCCGCA<br>ATGCTGGTCTctagattggatcttgctggca<br>c | ChrV 144455-144494<br>ChrV-u 155171-155210  |                   |
| <i>IRC22</i> | gggttcacctaaagggttggaCCTATTCGAAAT<br>TGTTAGCCCACCTATTTCTTTTTCAACCCA<br>CAAT  | ChrV 150496-1505450<br>ChrV-u 161212-161166 | 132               |
|              | P-                                                                           | ChrV 1505449-150407                         |                   |

|             |                                                                                     |                                            |     |
|-------------|-------------------------------------------------------------------------------------|--------------------------------------------|-----|
|             | TTTTATCAGTTCAGGTCATCTTTCTAGCCAT<br>CATCGGAGGTGTTctagattggatcttgctg<br>gcac          | ChrV-u 161165-161123                       |     |
| <i>MNN1</i> | gggttcctaagggttggaCAAATATGAATA<br>CGATCCATCAAAAACCTTCTGGGCCAATTGG<br>AGGGATA        | ChrV 154401-154450<br>ChrV-u 165117-165166 | 138 |
|             | P-<br>TGAGCGCCAAAGTAGCCGGTCGTGGTATTGT<br>ATTGAGTTTAGGTTCTctagattggatcttg<br>ctggcac | ChrV 154451-154496<br>ChrV-u 165167-165212 |     |

\*Uppercase bases correspond to homologies to the yeast chromosome; lowercase bases are common amplification sequences for the MLPA procedure. "P-" indicates 5' phosphorylation.

\*\*ChrV corresponds to the coordinates in ChrV in the S288C strain, whereas ChrV-u corresponds to the coordinates for the ChrV modified for the uGCR assay (RDKY6677).
